# Supplementary material for: CNTs-CaP/CS-AZ91D extracts induce CGRP production in dorsal root ganglion neurons to facilitate osteogenesis in rats
Source: Royal Society of Chemistry journal article supplement (doi:10.1039/d4bm01635a), 2025-01-01
Supplement: d4bm01635a2.pdf [file d4bm01635a2.pdf]

## **Supplemental information**

### **CNTs-CaP/CS-AZ91D extracts induce CGRP production in dorsal root ganglion neurons to facilitate osteogenesis in rats**

Yun Tang, Jinghan Lin, Tingting Zhao, Lina Sun, Tingjiao Liu\*

Department of Neurology, The First Affiliated Hospital of Harbin Medical University,  
Harbin, 150001, P.R. China

\*Correspondence: Tingjiao Liu

Email: [ltj\\_1989@hrbmu.edu.cn](mailto:ltj_1989@hrbmu.edu.cn)

ORCID: 0000-0001-6732-2993

Phone: (+86)-451-85555447

**Declarations of interest: none**

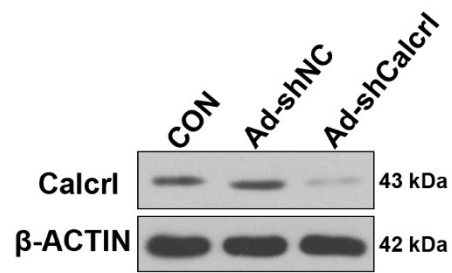

**Fig. S1 The validation of Calcr1 knockdown in BMSCs.**

The rat BMSCs were infected with indicated adenovirus carrying shNC/shCalcr1. At 48 h post the infection, the cells were harvested and subjected to the western-blot analysis.
